# Supplementary material
Source: PubMed Central journal article supplement (PMC2656399)
Supplement: NIHMS86544-supplement-1_si_001.pdf [file NIHMS86544-supplement-1_si_001.pdf]

## Supporting information

### **A New Class of Natural Glycopeptides with Sugar Moiety-dependent Antioxidant Activities derived from *Ganoderma lucidum* Fruiting Bodies**

Yalin Wu\* and Denong Wang

Department of Ophthalmology, Columbia University, New York, New York 10032; and Stanford Tumor Glycomics Laboratory, Department of Genetics, Stanford University School of Medicine, Stanford, California 94305

E-mails: [yw2248@columbia.edu](mailto:yw2248@columbia.edu)

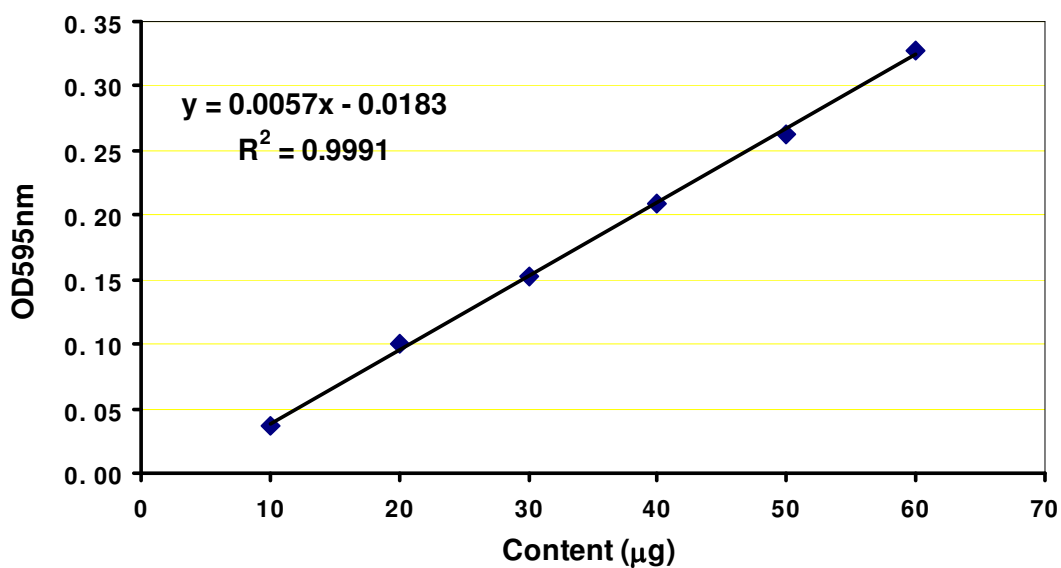

**Figure S1.** Protein calibration curve of a standard curve using Coomassie Brilliant Blue and bovine serum albumin as the standard.
